# Supplementary material
Source: PubMed Central journal article supplement (PMC5486216)
Supplement: NIHMS864770-supplement-supplement_1.pdf [file NIHMS864770-supplement-supplement_1.pdf]

Supplemental Table 1. Genes and single nucleotide polymorphisms (SNPs) in pro- and anti-inflammatory cytokine genes analyzed for morning and evening fatigue

| Gene          | SNP       | Position  | Chr | MAF  | Alleles | MORNING FATIGUE |         |       | EVENING FATIGUE |         |       |
|---------------|-----------|-----------|-----|------|---------|-----------------|---------|-------|-----------------|---------|-------|
|               |           |           |     |      |         | Chi Square      | p-value | Model | Chi Square      | p-value | Model |
| <i>IFNG1</i>  | rs2069728 | 66834051  | 12  | .079 | G>A     | 7.915           | .019    | A     | 0.419           | .811    | A     |
| <i>IFNG1</i>  | rs2069727 | 66834490  | 12  | .411 | A>G     | 1.241           | .538    | A     | 3.942           | .139    | A     |
| <i>IFNG1</i>  | rs2069718 | 66836429  | 12  | .442 | C>T     | 0.976           | .614    | A     | 5.243           | .073    | A     |
| <i>IFNG1</i>  | rs1861493 | 66837463  | 12  | .264 | A>G     | 0.158           | .924    | A     | FE              | .025    | D     |
| <i>IFNG1</i>  | rs1861494 | 66837676  | 12  | .279 | T>C     | 0.115           | .944    | A     | 3.743           | .155    | A     |
| <i>IFNG1</i>  | rs2069709 | 66839970  | 12  | .008 | G>T     | n/a             | n/a     | n/a   | n/a             | n/a     | n/a   |
| <i>IFNG1</i>  | HapA3     |           | 12  |      |         | 0.158           | .924    |       | 6.013           | .049    |       |
| <i>IFNG1</i>  | HapA5     |           | 12  |      |         | 1.241           | .538    |       | 3.942           | .139    |       |
| <i>IFNGR1</i> | rs9376268 | 137574444 | 6   | .246 | G>A     | 0.014           | .993    | A     | 2.759           | .252    | A     |
| <i>IL1B</i>   | rs1071676 | 106042060 | 2   | .198 | G>C     | 0.024           | .988    | A     | 5.368           | .068    | A     |
| <i>IL1B</i>   | rs1143643 | 106042929 | 2   | .331 | G>A     | 0.148           | .929    | A     | 1.125           | .570    | A     |
| <i>IL1B</i>   | rs1143642 | 106043180 | 2   | .095 | C>T     | 0.543           | .762    | A     | 0.831           | .660    | A     |
| <i>IL1B</i>   | rs1143634 | 106045017 | 2   | .196 | C>T     | 0.056           | .973    | A     | 5.612           | .060    | A     |
| <i>IL1B</i>   | rs1143633 | 106045094 | 2   | .345 | G>A     | 0.122           | .941    | A     | 1.427           | .490    | A     |
| <i>IL1B</i>   | rs1143630 | 106046282 | 2   | .103 | C>A     | 1.357           | .507    | A     | FE              | .041    | D     |
| <i>IL1B</i>   | rs3917356 | 106046990 | 2   | .432 | G>A     | 3.932           | .140    | A     | 1.419           | .492    | A     |
| <i>IL1B</i>   | rs1143629 | 106048145 | 2   | .353 | T>C     | 4.557           | .102    | A     | 1.800           | .407    | A     |
| <i>IL1B</i>   | rs1143627 | 106049014 | 2   | .390 | T>C     | 4.170           | .124    | A     | 3.255           | .196    | A     |
| <i>IL1B</i>   | rs16944   | 106049494 | 2   | .380 | G>A     | 4.320           | .115    | A     | 1.755           | .416    | A     |

|       |            |           |   |      |     |       |      |   |       |      |   |
|-------|------------|-----------|---|------|-----|-------|------|---|-------|------|---|
| IL1B  | rs1143623  | 106050452 | 2 | .248 | G>C | 3.433 | .180 | A | 1.727 | .422 | A |
| IL1B  | rs13032029 | 106055022 | 2 | .428 | C>T | 4.197 | .123 | A | 1.392 | .499 | A |
| IL1B  | HapA1      |           |   |      |     | 0.197 | .906 |   | 1.311 | .519 |   |
| IL1B  | HapA3      |           |   |      |     | FE    | .861 |   | FE    | .445 |   |
| IL1B  | HapA4      |           |   |      |     | 0.130 | .937 |   | 1.153 | .562 |   |
| IL1B  | HapA5      |           |   |      |     | 0.030 | .985 |   | 5.483 | .064 |   |
| IL1B  | HapB1      |           |   |      |     | 0.144 | .931 |   | 2.779 | .249 |   |
| IL1B  | HapB7      |           |   |      |     | 2.770 | .250 |   | 2.323 | .313 |   |
| IL1B  | HapB9      |           |   |      |     | 4.810 | .090 |   | 1.351 | .509 |   |
| IL1B  | HapB11     |           |   |      |     | 1.018 | .601 |   | 3.431 | .180 |   |
| IL1R1 | rs949963   | 96533648  | 2 | .213 | G>A | 1.954 | .376 | A | 0.616 | .735 | A |
| IL1R1 | rs2228139  | 96545511  | 2 | .066 | C>G | 1.422 | .491 | A | 3.342 | .188 | A |
| IL1R1 | rs3917320  | 96556738  | 2 | .068 | A>C | FE    | .688 | A | FE    | .557 | A |
| IL1R1 | rs2110726  | 96558145  | 2 | .333 | C>T | 0.205 | .902 | A | 3.826 | .148 | A |
| IL1R1 | rs3917332  | 96560387  | 2 | .124 | A>T | 3.468 | .177 | A | 0.718 | .698 | A |
| IL1R2 | rs4141134  | 96370336  | 2 | .401 | T>C | 2.723 | .256 | A | 3.452 | .178 | A |
| IL1R2 | rs11674595 | 96374804  | 2 | .233 | T>C | 0.738 | .691 | A | 0.535 | .765 | A |
| IL1R2 | rs7570441  | 96380807  | 2 | .393 | G>A | 0.250 | .882 | A | 0.459 | .795 | A |
| IL1R2 | HapA1      |           |   |      |     | 2.229 | .328 |   | 4.432 | .109 |   |
| IL1R2 | HapA2      |           |   |      |     | 1.621 | .445 |   | 0.745 | .689 |   |
| IL1R2 | HapA4      |           |   |      |     | 2.095 | .351 |   | 3.603 | .165 |   |
| IL2   | rs1479923  | 119096993 | 4 | .302 | C>T | 1.129 | .569 | A | 0.789 | .674 | A |

|     |           |           |   |      |     |       |      |     |       |      |     |
|-----|-----------|-----------|---|------|-----|-------|------|-----|-------|------|-----|
| IL2 | rs2069776 | 119098582 | 4 | .244 | T>C | 0.382 | .826 | A   | 1.798 | .407 | A   |
| IL2 | rs2069772 | 119099739 | 4 | .238 | A>G | 0.087 | .957 | A   | 1.027 | .598 | A   |
| IL2 | rs2069777 | 119103043 | 4 | .054 | C>T | FE    | .506 | A   | FE    | .748 | A   |
| IL2 | rs2069763 | 119104088 | 4 | .287 | T>G | 1.362 | .506 | A   | 1.042 | .594 | A   |
| IL2 | HapA1     |           |   |      |     | 0.343 | .842 |     | 0.147 | .929 |     |
| IL2 | HapA2     |           |   |      |     | 0.132 | .936 |     | 0.962 | .618 |     |
| IL2 | HapA3     |           |   |      |     | 0.206 | .902 |     | 1.618 | .445 |     |
| IL2 | HapA5     |           |   |      |     | 1.129 | .569 |     | 0.789 | .674 |     |
| IL4 | rs2243248 | 127200946 | 5 | .101 | T>G | 0.012 | .994 | A   | FE    | .037 | D   |
| IL4 | rs2243250 | 127201455 | 5 | .260 | C>T | n/a   | n/a  | n/a | n/a   | n/a  | n/a |
| IL4 | rs2070874 | 127202011 | 5 | .219 | C>T | 1.986 | .371 | A   | 1.004 | .605 | A   |
| IL4 | rs2227284 | 127205027 | 5 | .399 | C>A | 2.949 | .229 | A   | 3.145 | .208 | A   |
| IL4 | rs2227282 | 127205481 | 5 | .401 | C>G | 2.110 | .348 | A   | 2.374 | .305 | A   |
| IL4 | rs2243263 | 127205601 | 5 | .124 | C>G | FE    | .873 | A   | FE    | .067 | A   |
| IL4 | rs2243266 | 127206091 | 5 | .203 | G>A | 0.825 | .662 | A   | 0.563 | .755 | A   |
| IL4 | rs2243267 | 127206188 | 5 | .205 | G>C | 0.891 | .641 | A   | 0.601 | .740 | A   |
| IL4 | rs2243274 | 127207134 | 5 | .262 | G>A | 2.975 | .226 | A   | 0.398 | .820 | A   |
| IL4 | HapA1     |           |   |      |     | 1.716 | .424 |     | 1.845 | .397 |     |
| IL4 | HapA10    |           |   |      |     | 0.807 | .668 |     | 0.452 | .798 |     |
| IL6 | rs4719714 | 22643793  | 7 | .196 | A>T | 6.650 | .036 | A   | 4.257 | .119 | A   |
| IL6 | rs2069827 | 22648536  | 7 | .071 | G>T | 0.948 | .623 | A   | 0.681 | .712 | A   |
| IL6 | rs1800796 | 22649326  | 7 | .095 | C>G | n/a   | n/a  | n/a | n/a   | n/a  | n/a |

|             |            |           |   |      |     |       |      |     |       |      |     |
|-------------|------------|-----------|---|------|-----|-------|------|-----|-------|------|-----|
| <i>IL6</i>  | rs1800795  | 22649725  | 7 | .355 | C>G | 0.670 | .715 | A   | FE    | .018 | R   |
| <i>IL6</i>  | rs2069835  | 22650951  | 7 | .066 | T>C | FE    | .154 | A   | FE    | .071 | A   |
| <i>IL6</i>  | rs2066992  | 22651329  | 7 | .091 | G>T | n/a   | n/a  | n/a | n/a   | n/a  | n/a |
| <i>IL6</i>  | rs2069840  | 22651652  | 7 | .308 | C>G | 1.390 | .499 | A   | 1.380 | .502 | A   |
| <i>IL6</i>  | rs1554606  | 22651787  | 7 | .405 | G>T | 0.307 | .858 | A   | 3.923 | .141 | A   |
| <i>IL6</i>  | rs2069845  | 22653229  | 7 | .405 | A>G | 0.307 | .858 | A   | 3.923 | .141 | A   |
| <i>IL6</i>  | rs2069849  | 22654236  | 7 | .039 | C>T | n/a   | n/a  | n/a | n/a   | n/a  | n/a |
| <i>IL6</i>  | rs2069861  | 22654734  | 7 | .083 | C>T | FE    | .195 | A   | FE    | .186 | A   |
| <i>IL6</i>  | rs35610689 | 22656903  | 7 | .242 | A>G | 3.232 | .199 | A   | 0.650 | .723 | A   |
| <i>IL6</i>  | HapA4      |           |   |      |     | 1.584 | .453 |     | 1.448 | .485 |     |
| <i>IL6</i>  | HapA6      |           |   |      |     | 0.570 | .752 |     | 5.303 | .071 |     |
| <i>IL8</i>  | rs4073     | 70417508  | 4 | .498 | T>A | 0.824 | .662 | A   | 1.164 | .559 | A   |
| <i>IL8</i>  | rs2227306  | 70418539  | 4 | .366 | C>T | 0.341 | .843 | A   | 1.361 | .506 | A   |
| <i>IL8</i>  | rs2227543  | 70419394  | 4 | .374 | C>T | 0.528 | .768 | A   | 0.536 | .765 | A   |
| <i>IL8</i>  | HapA1      |           |   |      |     | 4.642 | .098 |     | 2.045 | .360 |     |
| <i>IL8</i>  | HapA3      |           |   |      |     | 0.341 | .843 |     | 1.361 | .506 |     |
| <i>IL8</i>  | HapA4      |           |   |      |     | 0.824 | .662 |     | 1.164 | .559 |     |
| <i>IL10</i> | rs3024505  | 177638230 | 1 | .138 | C>T | 0.185 | .912 | A   | 2.071 | .355 | A   |
| <i>IL10</i> | rs3024498  | 177639855 | 1 | .236 | A>G | 2.044 | .360 | A   | 2.294 | .318 | A   |
| <i>IL10</i> | rs3024496  | 177640190 | 1 | .459 | T>C | 0.352 | .838 | A   | 0.217 | .897 | A   |
| <i>IL10</i> | rs1878672  | 177642039 | 1 | .452 | G>C | 0.292 | .864 | A   | 0.505 | .777 | A   |
| <i>IL10</i> | rs3024492  | 177642438 | 1 | .207 | T>A | 1.756 | .416 | A   | 1.542 | .463 | A   |

|              |           |           |   |      |     |       |      |     |       |      |     |
|--------------|-----------|-----------|---|------|-----|-------|------|-----|-------|------|-----|
| <i>IL10</i>  | rs1518111 | 177642971 | 1 | .267 | G>A | 0.268 | .874 | A   | 2.636 | .268 | A   |
| <i>IL10</i>  | rs1518110 | 177643187 | 1 | .267 | G>T | 0.268 | .874 | A   | 2.636 | .268 | A   |
| <i>IL10</i>  | rs3024491 | 177643372 | 1 | .448 | G>T | 0.730 | .694 | A   | 0.080 | .961 | A   |
| <i>IL10</i>  | HapA5     |           |   |      |     | 0.580 | .748 |     | 1.839 | .399 |     |
| <i>IL10</i>  | HapA6     |           |   |      |     | 0.267 | .875 |     | 2.695 | .260 |     |
| <i>IL10</i>  | HapA8     |           |   |      |     | 1.796 | .407 |     | 1.529 | .466 |     |
| <i>IL10</i>  | HapA9     |           |   |      |     | 0.177 | .915 |     | 2.094 | .351 |     |
| <i>IL13</i>  | rs1881457 | 127184713 | 5 | .192 | A>C | 4.643 | .098 | A   | 0.627 | .731 | A   |
| <i>IL13</i>  | rs1800925 | 127185113 | 5 | .227 | C>T | 5.212 | .074 | A   | 0.746 | .689 | A   |
| <i>IL13</i>  | rs2069743 | 127185579 | 5 | .021 | A>G | n/a   | n/a  | n/a | n/a   | n/a  | n/a |
| <i>IL13</i>  | rs1295686 | 127188147 | 5 | .252 | G>A | 0.691 | .708 | A   | 3.272 | .195 | A   |
| <i>IL13</i>  | rs20541   | 127188268 | 5 | .174 | C>T | 0.514 | .773 | A   | 1.741 | .419 | A   |
| <i>IL13</i>  | HapA1     |           |   |      |     | 1.289 | .525 |     | 4.652 | .098 |     |
| <i>IL13</i>  | HapA4     |           |   |      |     | 0.343 | .842 |     | 1.973 | .373 |     |
| <i>IL17A</i> | rs4711998 | 51881422  | 6 | .293 | G>A | 0.027 | .987 | A   | 0.310 | .856 | A   |
| <i>IL17A</i> | rs8193036 | 51881562  | 6 | .255 | T>C | 3.347 | .188 | A   | 4.092 | .129 | A   |
| <i>IL17A</i> | rs3819024 | 51881855  | 6 | .374 | A>G | 0.022 | .989 | A   | 1.532 | .465 | A   |
| <i>IL17A</i> | rs2275913 | 51882102  | 6 | .345 | G>A | 2.204 | .332 | A   | 0.241 | .886 | A   |
| <i>IL17A</i> | rs3804513 | 51884266  | 6 | .027 | A>T | n/a   | n/a  | n/a | n/a   | n/a  | n/a |
| <i>IL17A</i> | rs7747909 | 51885318  | 6 | .225 | G>A | 0.757 | .685 | A   | 1.508 | .470 | A   |
| <i>NFKB1</i> | rs3774933 | 103645369 | 4 | .444 | T>C | 1.710 | .425 | A   | 1.635 | .442 | A   |
| <i>NFKB1</i> | rs170731  | 103667933 | 4 | .397 | A>T | 0.239 | .887 | A   | 0.998 | .607 | A   |

|              |            |           |    |      |     |       |       |     |       |      |     |
|--------------|------------|-----------|----|------|-----|-------|-------|-----|-------|------|-----|
| <i>NFKB1</i> | rs17032779 | 103685279 | 4  | .023 | T>C | n/a   | n/a   | n/a | n/a   | n/a  | n/a |
| <i>NFKB1</i> | rs230510   | 103695201 | 4  | .366 | T>A | 1.604 | .448  | A   | 4.861 | .088 | A   |
| <i>NFKB1</i> | rs230494   | 103706005 | 4  | .477 | A>G | 1.282 | .527  | A   | 1.006 | .605 | A   |
| <i>NFKB1</i> | rs4648016  | 103708706 | 4  | .017 | C>T | n/a   | n/a   | n/a | n/a   | n/a  | n/a |
| <i>NFKB1</i> | rs4648018  | 103709236 | 4  | .025 | G>C | n/a   | n/a   | n/a | n/a   | n/a  | n/a |
| <i>NFKB1</i> | rs3774956  | 103727564 | 4  | .479 | C>T | 1.041 | .594  | A   | 1.009 | .604 | A   |
| <i>NFKB1</i> | rs10489114 | 103730426 | 4  | .025 | A>G | n/a   | n/a   | n/a | n/a   | n/a  | n/a |
| <i>NFKB1</i> | rs4648068  | 103737343 | 4  | .366 | A>G | 0.210 | .900  | A   | 0.751 | .687 | A   |
| <i>NFKB1</i> | rs4648095  | 103746914 | 4  | .052 | T>C | FE    | 1.000 | A   | FE    | .326 | A   |
| <i>NFKB1</i> | rs4648110  | 103752867 | 4  | .205 | T>A | 0.043 | .979  | A   | 0.695 | .706 | A   |
| <i>NFKB1</i> | rs4648135  | 103755716 | 4  | .060 | A>G | FE    | 1.000 | A   | FE    | .545 | A   |
| <i>NFKB1</i> | rs4648141  | 103755947 | 4  | .188 | G>A | 0.682 | .711  | A   | 0.517 | .772 | A   |
| <i>NFKB1</i> | rs1609798  | 103756488 | 4  | .337 | C>T | 0.239 | .888  | A   | 1.293 | .524 | A   |
| <i>NFKB1</i> | HapA1      |           |    |      |     | 1.192 | .551  |     | 4.719 | .094 |     |
| <i>NFKB1</i> | HapA9      |           |    |      |     | 0.002 | .999  |     | 0.573 | .751 |     |
| <i>NFKB2</i> | rs12772374 | 104146901 | 10 | .229 | A>G | 0.128 | .938  | A   | 1.764 | .414 | A   |
| <i>NFKB2</i> | rs7897947  | 104147701 | 10 | .085 | T>G | 3.183 | .204  | A   | FE    | .039 | D   |
| <i>NFKB2</i> | rs11574849 | 104149686 | 10 | .317 | G>A | 0.501 | .778  | A   | 0.229 | .892 | A   |
| <i>NFKB2</i> | rs1056890  | 104152760 | 10 | .317 | C>T | 2.583 | .275  | A   | 3.939 | .140 | A   |
| <i>TNFA</i>  | rs2857602  | 31533378  | 6  | .360 | T>C | 0.027 | .987  | A   | 0.628 | .730 | A   |
| <i>TNFA</i>  | rs1800683  | 31540071  | 6  | .388 | G>A | 3.767 | .152  | A   | 3.559 | .169 | A   |
| <i>TNFA</i>  | rs2239704  | 31540141  | 6  | .370 | G>T | 0.014 | .993  | A   | 0.550 | .760 | A   |

|             |           |          |   |      |     |       |      |     |       |      |     |
|-------------|-----------|----------|---|------|-----|-------|------|-----|-------|------|-----|
| <i>TNFA</i> | rs2229094 | 31540556 | 6 | .256 | T>C | FE    | .042 | R   | FE    | .015 | D   |
| <i>TNFA</i> | rs1041981 | 31540784 | 6 | .388 | C>A | 3.767 | .152 | A   | 3.559 | .169 | A   |
| <i>TNFA</i> | rs1799964 | 31542308 | 6 | .202 | T>C | 2.699 | .259 | A   | 4.354 | .113 | A   |
| <i>TNFA</i> | rs1800750 | 31542963 | 6 | .019 | G>A | n/a   | n/a  | n/a | n/a   | n/a  | n/a |
| <i>TNFA</i> | rs1800629 | 31543031 | 6 | .157 | G>A | FE    | .006 | D   | 2.729 | .256 | A   |
| <i>TNFA</i> | rs1800610 | 31543827 | 6 | .105 | C>T | 1.434 | .488 | A   | 1.721 | .423 | A   |
| <i>TNFA</i> | rs3093662 | 31544189 | 6 | .072 | A>G | FE    | .006 | D   | FE    | .031 | D   |
| <i>TNFA</i> | HapA1     |          |   |      |     | 2.627 | .269 |     | 2.900 | .235 |     |
| <i>TNFA</i> | HapA5     |          |   |      |     | 2.767 | .251 |     | 3.811 | .149 |     |
| <i>TNFA</i> | HapA8     |          |   |      |     | 0.023 | .989 |     | 0.648 | .723 |     |

*Note.* A = additive model; Chr = chromosome; D = dominant model; Hap = haplotype, *IFNG* = interferon gamma; *IL* = interleukin; MAF = minor allele frequency; n/a = not assayed because SNP violated Hardy-Weinberg expectations ( $p < .001$ ) or because MAF was  $< .05$ ; *NFKB* = nuclear factor kappa beta; R = recessive model; *TNFA* = tumor necrosis factor alpha.
